# Supplementary material
Source: MDPI journal article supplement (https://www.mdpi.com/1424-8247/16/11/1626)

### Figure S1. Open field test.

On day +25, after MST, rats were treated with URB937 or vehicle daily for 5 days. On day +29, 1 hour after URB937 or vehicle treatment, animals were placed in the open-field arena (92 × 92 cm) and recorded for 10 min. The distance (expressed in meters) travelled in the apparatus (A), the average speed (expressed in meters/seconds) (B) and the total time immobile (expressed in seconds) (C) were analyzed by means of the ANY-Maze software (Ugo Basile, application version 4.99 g Beta). (D) Track plots of the different experimental groups. Data were tested with Kruskal-Wallis test followed by Dunn's multiple comparisons test since data were not normally distributed (Kolmogorov-Smirnov normality test). Data are expressed as mean ± SEM; N = 4

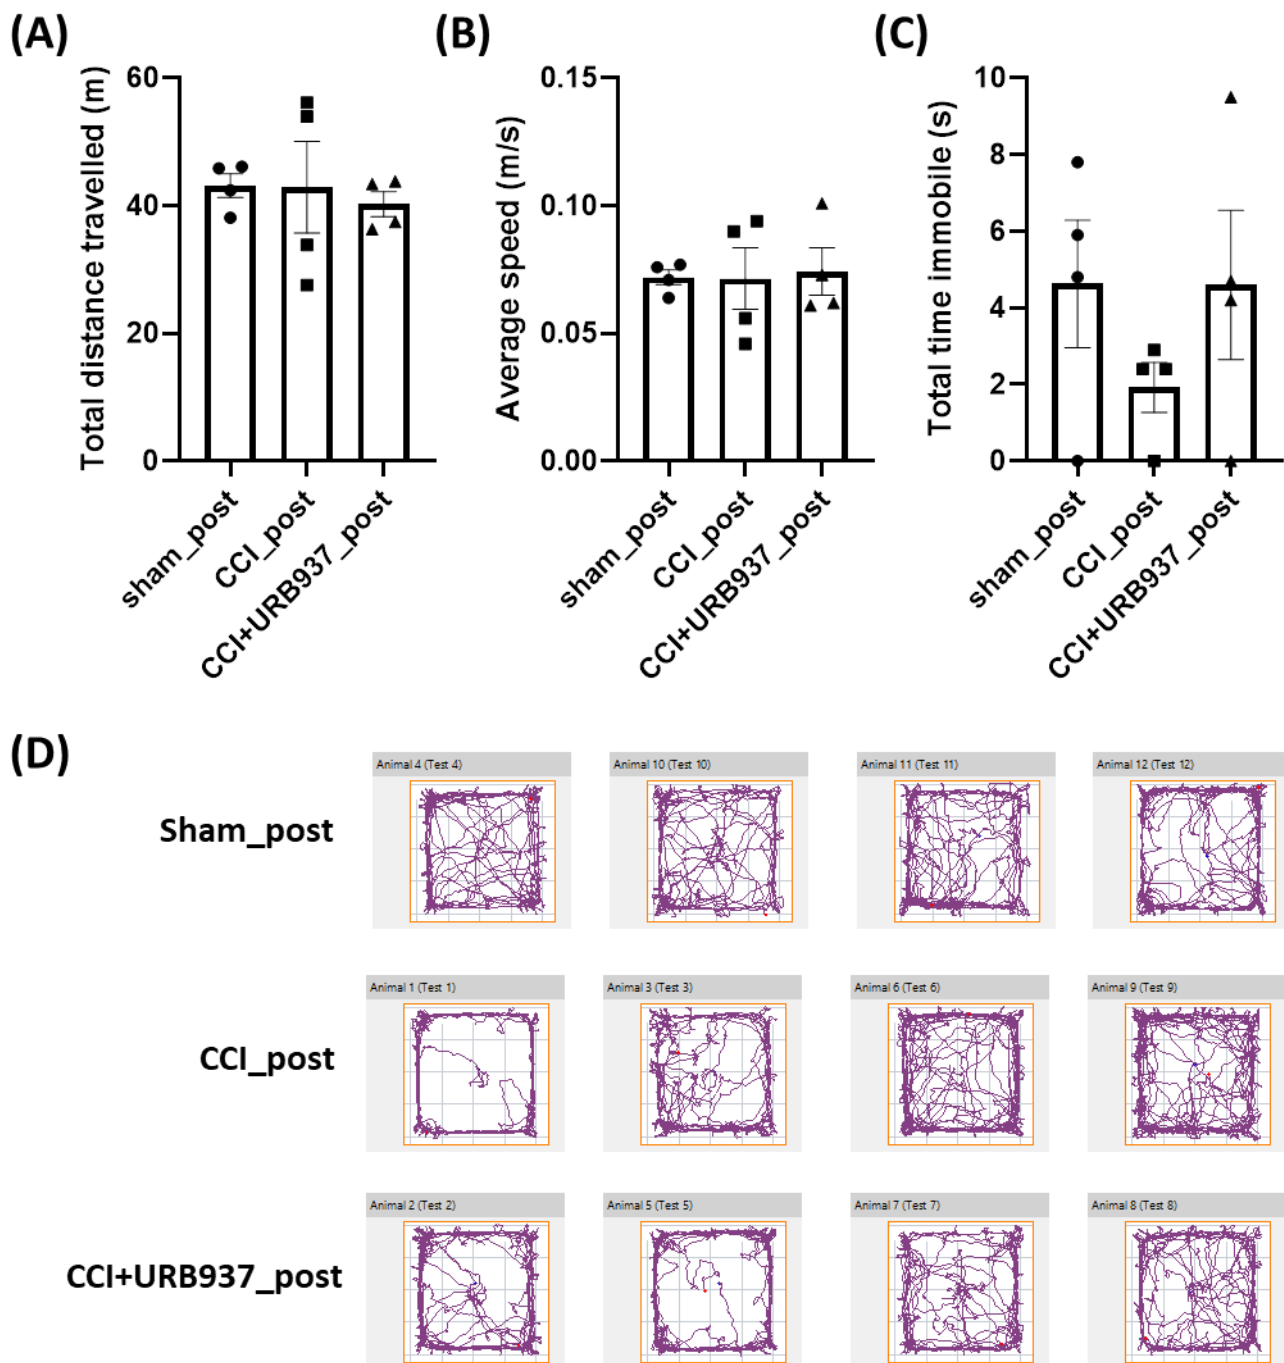

Supplement: s1 [file s1]
